# Supplementary material
Source: PubMed Central journal article supplement (PMC6086329)

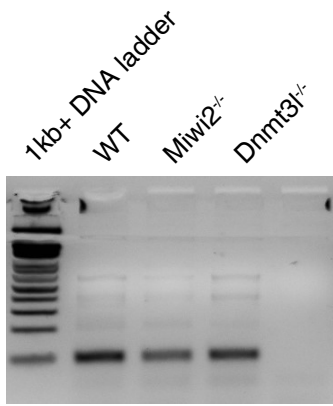

**GAPDH**

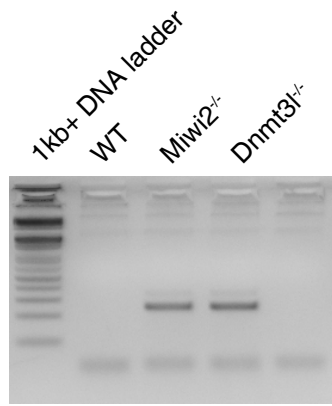

**Poteg Ex10 - Ex13/14**

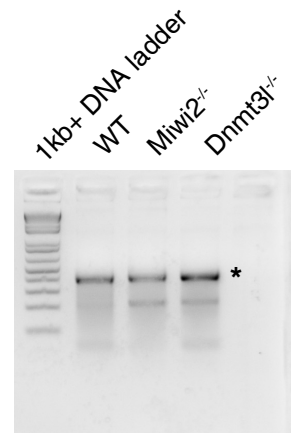

**Bhmt2 IAPLTR2-Ex8**

\*Non-specific amplification

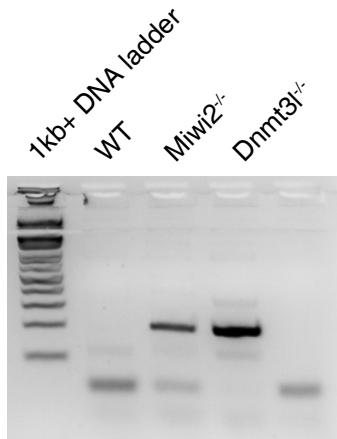

**Ky Ex2/3 - Ex5**

Supplement: NIHMS76823-supplement-1.pdf [file NIHMS76823-supplement-1.pdf]
